# Supplementary material
Source: publisher figshare collection journal article supplement (https://plos.figshare.com/articles/dataset/_/9731729)
Supplement: Supplementary file 1 [file 1]

Archive with 3 entries (3 files):
- pntd.0007689.s001.pdf
- pntd.0007689.s002.xlsx
- pntd.0007689.s003.pdf
