# Supplementary material
Source: publisher figshare collection journal article supplement (https://plos.figshare.com/articles/dataset/_/9731729)
Supplement: Supplementary file 1 [file 1 › pntd.0007689.s001.pdf]

# STROBE Statement—Checklist

|                          | Item No | Recommendation                                                                                                                                                                       | Manuscript Section                     |
|--------------------------|---------|--------------------------------------------------------------------------------------------------------------------------------------------------------------------------------------|----------------------------------------|
| Title and abstract       | 1       | (a) Indicate the study's design with a commonly used term in the title or the abstract                                                                                               | Abstract paragraph 2, page 2           |
|                          |         | (b) Provide in the abstract an informative and balanced summary of what was done and what was found                                                                                  | Abstract paragraph 2, 3, 4. Page 2     |
| <b>Introduction</b>      |         |                                                                                                                                                                                      |                                        |
| Background/rationale     | 2       | Explain the scientific background and rationale for the investigation being reported                                                                                                 | Introduction paragraph 2, 3. Page 4    |
| Objectives               | 3       | State specific objectives, including any pre-specified hypotheses                                                                                                                    | Introduction paragraph 4. Page 5       |
| <b>Methods</b>           |         |                                                                                                                                                                                      |                                        |
| Study design             | 4       | Present key elements of study design early in the paper                                                                                                                              | Methods paragraph 2. Page 5            |
| Setting                  | 5       | Describe the setting, locations, and relevant dates, including periods of recruitment, exposure, follow-up, and data collection                                                      | Methods paragraph 1, 2. Page 5         |
| Participants             | 6       | (a) Give the eligibility criteria, and the sources and methods of case ascertainment and control selection. Give the rationale for the choice of cases and controls                  | Methods paragraph 1. Page 5            |
|                          |         | (b) For matched studies, give matching criteria and the number of controls per case                                                                                                  | N/A                                    |
| Variables                | 7       | Clearly define all outcomes, exposures, predictors, potential confounders, and effect modifiers. Give diagnostic criteria, if applicable                                             | Methods paragraph 1, 2, 3. Pages 5 & 6 |
| Data sources/measurement | 8*      | For each variable of interest, give sources of data and details of methods of assessment (measurement). Describe comparability of assessment methods if there is more than one group | Methods paragraph 2,3,4. Pages 6 & 7   |
| Bias                     | 9       | Describe any efforts to address potential sources of bias                                                                                                                            | N/A                                    |
| Study size               | 10      | Explain how the study size was arrived at                                                                                                                                            | N/A                                    |
| Quantitative variables   | 11      | Explain how quantitative variables were handled in the analyses. If applicable, describe which groupings were chosen and why                                                         | Method paragraph 5. Page 7             |
| Statistical methods      | 12      | (a) Describe all statistical methods, including those used to control for confounding                                                                                                | Method paragraph 5. Page 7             |
|                          |         | (b) Describe any methods used to examine subgroups and interactions                                                                                                                  | Method paragraph 5. Page 7             |

|                   |     |                                                                                                                                                                                                              |                                             |
|-------------------|-----|--------------------------------------------------------------------------------------------------------------------------------------------------------------------------------------------------------------|---------------------------------------------|
|                   |     | (c) Explain how missing data were addressed                                                                                                                                                                  |                                             |
|                   |     | (d) If applicable, explain how matching of cases and controls was addressed                                                                                                                                  | N/A                                         |
|                   |     | (e) Describe any sensitivity analyses                                                                                                                                                                        | N/A                                         |
| <b>Results</b>    |     |                                                                                                                                                                                                              |                                             |
| Participants      | 13* | (a) Report numbers of individuals at each stage of study—eg numbers potentially eligible, examined for eligibility, confirmed eligible, included in the study, completing follow-up, and analysed            | Results paragraph 1. Page 8                 |
|                   |     | (b) Give reasons for non-participation at each stage                                                                                                                                                         | Figure 1                                    |
|                   |     | (c) Consider use of a flow diagram                                                                                                                                                                           | Figure 1                                    |
| Descriptive data  | 14* | (a) Give characteristics of study participants (eg demographic, clinical, social) and information on exposures and potential confounders                                                                     | Results, Table 3 Pages 15 & 16              |
|                   |     | (b) Indicate number of participants with missing data for each variable of interest                                                                                                                          | N/A                                         |
| Outcome data      | 15* | Report numbers in each exposure category, or summary measures of exposure                                                                                                                                    | Results, Table 1. Page 9 & 10               |
| Main results      | 16  | (a) Give unadjusted estimates and, if applicable, confounder-adjusted estimates and their precision (eg, 95% confidence interval). Make clear which confounders were adjusted for and why they were included | Results paragraph 2, Table 2. Pages 12 & 13 |
|                   |     | (b) Report category boundaries when continuous variables were categorized                                                                                                                                    | Results paragraph 3. Page 17                |
|                   |     | (c) If relevant, consider translating estimates of relative risk into absolute risk for a meaningful time period                                                                                             | N/A                                         |
| Other analyses    | 17  | Report other analyses done—eg analyses of subgroups and interactions, and sensitivity analyses                                                                                                               | Results paragraph 4. Page 18                |
| <b>Discussion</b> |     |                                                                                                                                                                                                              |                                             |
| Key results       | 18  | Summarise key results with reference to study objectives                                                                                                                                                     | Discussion paragraph 1,2,3. Pages 18 & 19   |
| Limitations       | 19  | Discuss limitations of the study, taking into account sources of potential bias or imprecision. Discuss both direction and magnitude of any potential bias                                                   | Discussion paragraph 3. Page 19             |
| Interpretation    | 20  | Give a cautious overall interpretation of results considering objectives, limitations, multiplicity of analyses, results from similar studies, and other relevant evidence                                   | Discussion paragraph 1, 3. Pages 18 & 19    |
| Generalisability  | 21  | Discuss the generalisability (external validity) of the study results                                                                                                                                        | Discussion paragraph 4.                     |

**Other information**

---

|         |    |                                                                                                                                                               |         |
|---------|----|---------------------------------------------------------------------------------------------------------------------------------------------------------------|---------|
| Funding | 22 | Give the source of funding and the role of the funders for the present study and, if applicable, for the original study on which the present article is based | Page 20 |
|---------|----|---------------------------------------------------------------------------------------------------------------------------------------------------------------|---------|

---
