# Supplementary material
Source: publisher figshare collection journal article supplement (https://plos.figshare.com/articles/dataset/_/9731729)
Supplement: Supplementary file 1 [file 1 › pntd.0007689.s002.xlsx]

## Sheet: Sheet1
											Sample type	Duration before treatment(weeks)	Weight
serial No.	PR	Study site	Year of recruitment	Age (yrs)	Sex	Lesion site	Form of lesion	Category of lesion	Treatment	Time to healing				PCR results	week of paradox	Type of reaction	PR_type
1	yes	Agogo	2013	17	Female	Lower limb	Ulcer	II	SR8	44	Swab	2	42	Positive	4	Enlarged, Warm to touch	enlarged
2	no	Agogo	2013	8	Male	Back	Plaque	II	CR8	40	FNA	2	22	Positive		Not applicable
3	no	Agogo	2013	33	Male	Upper limb	Nodule	I	SR8	20	FNA	20	68	Positive		Not applicable
5	no	Agogo	2013	16	Female	Lower limb	Ulcer	I	CR8	28	Swab	8	51	Positive		Not applicable
6	no	Agogo	2013	8	Male	Lower limb	Plaque	I	SR8	28	FNA	2	25	Positive		Not applicable
7	no	Agogo	2013	16	Female	Lower limb	Nodule	I	CR8	4	FNA	8	60	Positive		Not applicable
8	no	Agogo	2013	6	Male	Upper limb	Plaque	II	SR8	20	FNA	2	20	Positive		Not applicable
9	no	Agogo	2013	7	Female	Upper limb	Plaque	II	SR8	20	FNA	1	22	Positive		Not applicable
10	no	Agogo	2013	45	Female	Upper limb	Nodule	I	CR8	44	FNA	1	49	Positive		Not applicable
11	no	Agogo	2013	11	Male	Upper limb	Nodule	I	CR8	20	FNA	2	24	Positive		Not applicable
12	no	Agogo	2013	34	Female	Thorax	Nodule	I	CR8	16	FNA	4	45	Positive		Not applicable
13	no	Agogo	2013	14	Male	Upper limb	Plaque	I	SR8	4	FNA	2	42	Positive		Not applicable
14	no	Agogo	2013	13	Male	Upper limb	Nodule	I	CR8	24	FNA	1	36	Positive		Not applicable
15	no	Agogo	2013	11	Male	Upper limb	Nodule	I	SR8	6	FNA	1	31	Positive		Not applicable
16	no	Agogo	2013	27	Female	Lower limb	Plaque	II	SR8	48	FNA	8	55	Positive		Not applicable
17	no	Agogo	2013	12	Female	Upper limb	Plaque	II	CR8	12	FNA	10	22	Positive		Not applicable
18	no	Agogo	2013	12	Female	Upper limb	Nodule	I	SR8	24	FNA	3	37	Positive		Not applicable
19	no	Agogo	2013	16	Female	Buttocks & Perineum	Ulcer	I	CR8	16	Swab	12	53	Positive		Not applicable
22	no	Tepa	2013	60	Female	Lower limb	Ulcer	I	CR8	40	Swab	UnKnown	37	Positive		Not applicable
23	no	Tepa	2013	9	Male	Upper limb	Ulcer	I	CR8	2	Swab	UnKnown	26	Positive		Not applicable
24	no	Tepa	2013	45	Female	Thorax	Ulcer	II	SR8	33	Swab	UnKnown	54	Positive		Not applicable
25	no	Nkawie	2013	8	Male	Lower limb	Oedema	II	CR8	37	Swab	3	23	Positive		Not applicable
26	no	Nkawie	2013	12	Female	Lower limb	Ulcer	II	SR8	20	Swab	UnKnown	28	Positive		Not applicable
27	no	Nkawie	2013	54	Female	Lower limb	Ulcer	II	CR8	24	Swab	UnKnown	61	Positive		Not applicable
28	no	Nkawie	2013	61	Male	Lower limb	Nodule	I	SR8	28	FNA	4	64	Positive		Not applicable
29	no	Tepa	2013	13	Female	Upper limb	Plaque	I	CR8	28	FNA	8	28	Positive		Not applicable
30	no	Tepa	2013	31	Male	Lower limb	Ulcer	I	SR8	6	Swab	UnKnown	60	Positive		Not applicable
31	no	Tepa	2013	55	Male	Lower limb	Ulcer	I	SR8	8	Swab	UnKnown	58	Positive		Not applicable
32	no	Tepa	2013	40	Male	Lower limb	Nodule	I	CR8	6	FNA	UnKnown	59	Positive		Not applicable
33	no	Agogo	2013	9	Male	Upper limb	Plaque	II	CR8	77	FNA	1	26	Positive		Not applicable
34	yes	Dunkwa	2013	9	Female	Lower limb	Ulcer	II	CR8	30	Swab	4	25	Positive	52	New lesion	new lesion
35	no	Agogo	2013	28	Female	Upper limb	Nodule	I	CR8	20	FNA	4	53	Positive		Not applicable
37	no	Dunkwa	2013	33	Male	Lower limb	Ulcer	II	CR8	20	Swab	18	63	Positive		Not applicable
38	no	Agogo	2013	22	Female	Upper limb	Nodule	I	SR8	4	FNA	1	47	Positive		Not applicable
39	no	Agogo	2013	47	Male	Upper limb	Nodule	I	SR8	20	FNA	2	60	Positive		Not applicable
40	no	Agogo	2013	14	Female	Upper limb	Nodule	I	SR8	28	FNA	3	48	Positive		Not applicable
41	no	Tepa	2013	13	Male	Upper limb	Nodule	I	CR8	29	FNA	UnKnown		Positive		Not applicable
42	yes	Tepa	2013	32	Female	Upper limb	Nodule	I	SR8	24	FNA	4	49	Positive	8	Enlarged, inflamed and puss filled	enlarged
43	no	Dunkwa	2013	15	Male	Upper limb	Ulcer	II	SR8	20	Swab	8	58	Positive		Not applicable
44	no	Agogo	2013	24	Female	Upper limb	Nodule	I	CR8	2	FNA	1	22	Positive		Not applicable
45	no	Agogo	2013	12	Female	Lower limb	Plaque	I	CR8	6	FNA	3	24	Positive		Not applicable
46	no	Agogo	2013	37	Female	Lower limb	Nodule	I	SR8	4	FNA	2	58	Positive		Not applicable
48	no	Agogo	2013	24	Female	Upper limb	Nodule	I	CR8	2	FNA	3	57	Positive		Not applicable
51	no	Tepa	2013	16	Male	Upper limb	Plaque	II	SR8	44	FNA	4	50	Positive		Not applicable
52	no	Agogo	2013	22	Female	Lower limb	Plaque	II	CR8	4	FNA	1	60	Positive		Not applicable
53	no	Agogo	2013	22	Female	Lower limb	Plaque	II	SR8	37	FNA	12	50	Positive		Not applicable
54	no	Tepa	2013	9	Male	Abdomen	Ulcer	II	SR8	16	Swab	4	24	Positive		Not applicable
55	no	Agogo	2013	9	Female	Upper limb	Ulcer	II	CR8	24	Swab	3	30	Positive		Not applicable
56	no	Agogo	2013	44	Female	Lower limb	Nodule	I	CR8	24	FNA	6	60	Positive		Not applicable
57	no	Nkawie	2013	15	Male	Upper limb	Plaque	II	CR8	44	FNA	2	48	Positive		Not applicable
58	no	Tepa	2013	10	Male	Back	Plaque	I	CR8	24	FNA	4	30	Positive		Not applicable
59	no	Agogo	2013	9	Female	Lower limb	Ulcer	II	CR8	12	Swab	8	21	Positive		Not applicable
60	no	Agogo	2013	9	Female	Upper limb	Plaque	II	SR8	9	Fna	1	23	Positive		Not applicable
61	no	Agogo	2013	8	Male	Lower limb	Ulcer	II	SR8	6	Swab	3	22	Positive		Not applicable
62	yes	Agogo	2013	10	Male	Upper limb	Plaque	I	SR8	36	FNA	1	30	Positive	6	Enlarged, Warm to touch	enlarged
63	no	Tepa	2013	8	Male	Lower limb	Plaque	II	SR8	16	Swab	4	23	Positive		Not applicable
64	no	Dunkwa	2013	5	Female	Upper limb	Oedema	I	SR8	6	Swab	12	20	Positive		Not applicable
65	no	Agogo	2014	6	Female	Head & Neck	Plaque	I	CR8	35	FNA	2	26	Positive		Not applicable
66	no	Tepa	2014	13	Female	Lower limb	Ulcer	II	SR8	16	Swab	3	43	Positive		Not applicable
67	yes	Tepa	2014	37	Male	Upper limb	Nodule	I	CR8	24	FNA	2	63	Positive	6	Enlarged, Warm to touch	enlarged
68	yes	Agogo	2014	38	Female	Upper limb	Ulcer	I	SR8	24	Swab	3	68	Positive	5	multiple new lesions	new lesion
69	yes	Nkawie	2014	15	Male	Upper limb	Plaque	II	CR8	48	FNA	3	49	Positive	8	Enlarged, Warm to touch	enlarged
70	no	Nkawie	2014	20	Male	Lower limb	Ulcer	II	SR8	28	Swab	20	63	Positive		Not applicable
71	no	Nkawie	2014	46	Male	Lower limb	Ulcer	II	SR8	28	Swab	10	59	Positive		Not applicable
72	no	Agogo	2014	10	Male	Lower limb	Ulcer	II	SR8	8	FNA	8	32	Positive		Not applicable
74	no	Agogo	2014	16	Male	Upper limb	Plaque	I	CR8	4	FNA	2	54	Positive		Not applicable
75	no	Agogo	2014	13	Female	Lower limb	Ulcer	II	CR8	12	Swab	2	46	Positive		Not applicable
77	no	Agogo	2014	56	Male	Upper limb	Nodule	I	SR8	20	FNA	16	69	Positive		Not applicable
78	no	Agogo	2014	40	Female	Buttocks & Perineum	Nodule	I	SR8	32	Swab	4	50	Positive		Not applicable
79	yes	Agogo	2014	9	Female	Lower limb	Plaque	II	CR8	52	FNA	5	23	Positive	6	Enlarged,warm and Painful	enlarged
80	no	Agogo	2014	15	Male	Upper limb	Nodule	I	SR8	24	FNA	2	63	Positive		Not applicable
81	no	Agogo	2014	10	Female	Lower limb	Nodule	I	CR8	22	FNA	2	24	Positive		Not applicable
82	no	Tepa	2014	33	Female	Lower limb	Oedema	II	CR8	28	Swab	4	65	Positive		Not applicable
83	yes	Agogo	2014	5	Male	Lower limb	Nodule	II	SR8	24	FNA	8	20	Positive	2	Enlarged, Pus filled	enlarged
84	no	Agogo	2014	12	Female	Upper limb	Plaque	II	CR8	24	FNA	2	31	Positive		Not applicable
85	yes	Tepa	2014	8	Female	Upper limb	Plaque	I	SR8	28	FNA	3	25	Positive	12	enlargement and swelling	enlarged
86	yes	Nkawie	2014	9	Male	Upper limb	Plaque	II	SR8	24	FNA	8	25	Positive	6	Enlarged, swelling	enlarged
87	no	Dunkwa	2014	10	Female	Lower limb	Ulcer	II	CR8	4	Swab	8	30	Positive		Not applicable
89	no	Agogo	2014	13	Male	Upper limb	Plaque	II	SR8	24	FNA	8	42	Positive		Not applicable
91	no	Nkawie	2014	21	Female	Lower limb	Ulcer	I	CR8	8	Swab	4	55	Positive		Not applicable
92	no	Tepa	2014	78	Male	Lower limb	Ulcer	II	SR8	8	Swab	2	56	Positive		Not applicable
93	no	Dunkwa	2014	11	Male	Head & Neck	Ulcer	II	SR8	12	Swab	8	27	Positive		Not applicable
94	no	Dunkwa	2014	24	Female	Lower limb	Ulcer	II	SR8	12	Swab	2	58	Positive		Not applicable
95	no	Agogo	2014	9	Female	Upper limb	Plaque	II	SR8	24	FNA	4	27	Positive		Not applicable
96	no	Agogo	2014	45	Male	Lower limb	Ulcer	II	CR8	8	Swab	3	50	Positive		Not applicable
97	no	Agogo	2014	6	Female	Upper limb	Plaque	II	CR8	28	FNA	2	20	Positive		Not applicable
98	yes	Agogo	2014	51	Male	Upper limb	Nodule	I	CR8	24	FNA	3	52	Positive	6	Enlarged, Pus filled	enlarged
99	yes	Agogo	2014	13	Male	Lower limb	Plaque	II	SR8	45	FNA	4	32	Positive	4	enlarged with red and swollen	enlarged
100	yes	Agogo	2014	38	Male	Upper limb	Nodule	I	CR8	8	FNA	6	52	Positive	4	Enlarged, Warm to touch	enlarged
101	no	Dunkwa	2014	16	Female	Lower limb	Ulcer	I	CR8	4	Swab	4	56	Positive		Not applicable
102	no	Tepa	2014	24	Male	Upper limb	Plaque	II	CR8	36	FNA	8	69	Positive		Not applicable
103	yes	Agogo	2014	16	Female	Upper limb	Ulcer	II	CR8	20	Swab	12	45	Positive	11	New lesion	new lesion
104	no	Agogo	2014	7	Male	Head & Neck	Nodule	I	SR8	6	FNA	12	21	Positive		Not applicable
105	no	Tepa	2014	7	Female	Upper limb	Oedema	II	SR8	52	FNA	2	22	Positive		Not applicable
106	no	Tepa	2014	14	Male	Lower limb	Oedema	II	CR8	44	Swab	4	32	Positive		Not applicable
107	no	Agogo	2014	11	Male	Upper limb	Ulcer	II	CR8	55	Swab	8	30	Positive		Not applicable
108	no	Agogo	2014	6	Male	Upper limb	Oedema	II	CR8	6	FNA	8	20	Positive		Not applicable
109	no	Agogo	2014	15	Male	Lower limb	Ulcer	II	SR8	8	Swab	4	69	Positive		Not applicable
110	no	Dunkwa	2014	13	Male	Lower limb	Ulcer	II	CR8	48	Swab	8	26	Positive		Not applicable
111	no	Agogo	2014	11	Female	Upper limb	Ulcer	II	SR8	32	Swab	4	36	Positive		Not applicable
112	no	Agogo	2014	11	Male	Lower limb	Nodule	I	SR8	4	FNA	2	35	Positive		Not applicable
113	no	Agogo	2014	11	Male	Lower limb	Ulcer	I	CR8	8	FNA	6	30	Positive		Not applicable
114	no	Agogo	2014	9	Female	Upper limb	Nodule	I	SR8	20	FNA	8	28	Positive		Not applicable
115	no	Agogo	2014	8	Male	Upper limb	Ulcer	I	SR8	8	Swab	4	25	Positive		Not applicable
116	no	Agogo	2014	35	Male	Lower limb	Nodule	I	SR8	4	FNA	2	53	Positive		Not applicable
117	yes	Agogo	2014	8	Female	Lower limb	Nodule	I	CR8	28	FNA	2	20	Positive	4	Enlargement, warm to touch and redening	enlarged
118	no	Agogo	2014	50	Female	Lower limb	Ulcer	II	CR8	4	Swab	2	70	Positive		Not applicable
119	no	Agogo	2014	15	Male	Lower limb	Nodule	I	SR8	2	FNA	6	36	Positive		Not applicable
120	yes	Agogo	2014	47	Female	Lower limb	Plaque	II	SR8	24	FNA	3	47	Positive	4	Enlarged, warm reddened	enlarged
121	no	Agogo	2014	11	Male	Lower limb	Ulcer	I	CR8	2	FNA	6	29	Positive		Not applicable
122	no	Agogo	2014	67	Female	Lower limb	Ulcer	II	SR8	8	Swab	3	50	Positive		Not applicable
123	no	Agogo	2014	13	Male	Lower limb	Nodule	I	CR8	4	FNA	3	33	Positive		Not applicable
124	yes	Agogo	2014	5	Female	Lower limb	Nodule	I	SR8	24	FNA	2	20	Positive	10	New Lesion	new lesion
125	no	Agogo	2014	7	Female	Lower limb	Ulcer	I	CR8	6	Swab	4	22	Positive		Not applicable
126	yes	Agogo	2014	13	Male	Upper limb	Plaque	I	SR8	32	FNA	1	28	Positive	2	Enlarged, Warm to touch	enlarged
127	no	Agogo	2014	14	Male	Lower limb	Ulcer	I	CR8	6	Swab	3	38	Positive		Not applicable
128	no	Agogo	2014	6	Male	Lower limb	Ulcer	I	CR8	2	FNA	4	20	Positive		Not applicable
129	no	Agogo	2014	85	Male	Lower limb	Nodule	II	CR8	24	FNA	4	55	Positive		Not applicable
130	no	Agogo	2014	7	Female	Upper limb	Plaque	I	SR8	4	FNA	4	20	Positive		Not applicable
131	no	Agogo	2014	25	Female	Lower limb	Ulcer	I	CR8	4	Swab	2	51	Positive		Not applicable
132	yes	Dunkwa	2014	40	Female	Upper limb	Oedema	II	CR8	12	Swab	2	52	Positive	4	New lesion	new lesion
133	no	Dunkwa	2014	5	Male	Upper limb	Nodule	I	SR8	12	FNA	6	20	Positive		Not applicable
134	no	Dunkwa	2014	48	Female	Lower limb	Ulcer	I	CR8	4	Swab	3	70	Positive		Not applicable
135	no	Dunkwa	2014	12	Female	Lower limb	Ulcer	II	SR8	6	Swab	12	40	Positive		Not applicable
136	no	Dunkwa	2014	13	Male	Lower limb	Ulcer	I	CR8	4	Swab	3	45	Positive		Not applicable
137	no	Tepa	2014	54	Female	Lower limb	Ulcer	II	SR8	6	Swab	24	75	Positive		Not applicable
138	no	Tepa	2014	21	Male	Lower limb	Ulcer	I	CR8	28	Swab	6	63	Positive		Not applicable
139	no	Nkawie	2014	64	Male	Lower limb	Ulcer	II	SR8	36	Swab	UnKnown		Positive		Not applicable
140	no	Nkawie	2014	11	Female	Lower limb	Ulcer	II	SR8	52	Swab	8	29	Positive		Not applicable
141	no	Agogo	2014	6	Female	Upper limb	Plaque	I	SR8	16	FNA	3	20	Positive		Not applicable
142	no	Agogo	2014	24	Female	Lower limb	Ulcer	II	SR8	2	FNA	2	59	Positive		Not applicable
143	yes	Agogo	2014	6	Male	Lower limb	Plaque	II	SR8	20	FNA	1	20	Positive	8	Enlarged, Warm to touch	enlarged
144	no	Dunkwa	2015	65	Male	Lower limb	Ulcer	I	SR8	12	Swab	4	55	Positive		Not applicable
145	no	Tepa	2015	14	Male	Lower limb	Ulcer	I	SR8	24	Swab	12	44	Positive		Not applicable
146	yes	Tepa	2015	14	Female	Lower limb	Oedema	II	CR8	24	Swab	8	29	Positive	28	New lesion	new lesion
147	no	Tepa	2015	11	Female	Upper limb	Ulcer	II	SR8	8	Swab	4	45	Positive		Not applicable
148	no	Agogo	2015	8	Male	Head & Neck	Nodule	I	SR8	20	FNA	2	29	Positive		Not applicable
149	no	Agogo	2015	5	Male	Upper limb	Plaque	II	CR8	32	FNA	2	22	Positive		Not applicable
150	no	Agogo	2015	9	Female	Lower limb	Plaque	II	CR8	28	FNA	2	30	Positive		Not applicable
151	no	Agogo	2015	25	Female	Abdomen	Nodule	II	SR8	24	FNA	1	25	Positive		Not applicable
152	yes	Agogo	2015	29	Female	Upper limb	Plaque	II	CR8	28	FNA	8	61	Positive	4	Enlarged, inflamatory, redened	enlarged
153	no	Agogo	2015	25	Female	Lower limb	Nodule	I	SR8	16	FNA	6	51	Positive		Not applicable
154	no	Agogo	2015	25	Male	Upper limb	Plaque	II	SR8	8	FNA	2	75	Positive		Not applicable
155	no	Agogo	2015	6	Female	Lower limb	Ulcer	II	CR8	20	FNA	4	20	Positive		Not applicable
156	yes	Agogo	2015	7	Male	Lower limb	Nodule	I	CR8	32	FNA	4	20	Positive	6	Enlarged, Warm to touch	enlarged
157	no	Dunkwa	2015	15	Male	Upper limb	Plaque	II	CR8	36	Swab	16	45	Positive		Not applicable
158	no	Dunkwa	2015	26	Male	Upper limb	Ulcer	I	SR8	2	Swab	20	26	Positive		Not applicable
159	yes	Nkawie	2015	58	Male	Lower limb	Ulcer	II	CR8	20	Swab	16	48	Positive	24	new Lesion,warm to touch,pus filled and painful	new lesion
160	yes	Agogo	2015	9	Male	Lower limb	Plaque	II	SR8	24	FNA	2	24	Positive	2	Enlarged, Warm and Redening	enlarged
161	no	Agogo	2015	32	Female	Lower limb	Plaque	II	CR8	2	FNA	2	55	Positive		Not applicable
162	no	Agogo	2015	27	Female	Upper limb	Nodule	I	SR8	8	FNA	2	48	Positive		Not applicable
163	no	Agogo	2015	20	Male	Lower limb	Ulcer	II	CR8	40	Swab	8	60	Positive		Not applicable
164	yes	Agogo	2015	25	Female	Upper limb	Nodule	II	CR8	32	FNA	4	55	Positive	6	Enlarged, Inflamatory	enlarged
165	no	Agogo	2015	11	Male	Upper limb	Plaque	II	CR8	21	FNA	1	32	Positive		Not applicable
166	no	Tepa	2015	6	Male	Lower limb	Ulcer	II	CR8	32	Swab	3	20	Positive		Not applicable
167	no	Tepa	2015	14	Female	Lower limb	Ulcer	I	SR8	8	Swab	UnKnown		Positive		Not applicable
168	no	Dunkwa	2015	11	Female	Lower limb	Ulcer	II	SR8	4	Swab	4	34	Positive		Not applicable
170	no	Nkawie	2015	32	Male	Upper limb	Nodule	II	SR8	8	FNA	16	58	Positive		Not applicable
171	no	Agogo	2015	25	Female	Upper limb	Plaque	I	SR8	24	FNA	2	25	Positive		Not applicable
172	yes	Agogo	2015	31	Male	Upper limb	Nodule	I	SR8	24	FNA	3	31	Positive	8	Enlarged, Warm to touch	enlarged
173	yes	Agogo	2015	13	Female	Upper limb	Nodule	I	SR8	33	FNA	6	36	Positive	12	Excessive warmness, inflammation and Pus exudates	enlarged
174	no	Agogo	2015	16	Female	Buttocks & Perineum	Nodule	I	CR8	4	FNA	1	65	Positive		Not applicable
175	no	Tepa	2015	40	Female	Lower limb	Nodule	I	SR8	4	FNA	UnKnown		Positive		Not applicable
176	no	Tepa	2015	65	Male	Lower limb	Ulcer	II	SR8	12	Swab	UnKnown		Positive		Not applicable
177	no	Agogo	2015	58	Female	Lower limb	Nodule	II	SR8	8	FNA	4	62	Positive		Not applicable
178	no	Nkawie	2015	6	Male	Lower limb	Ulcer	I	CR8	24	Swab	UnKnown		Positive		Not applicable
179	no	Tepa	2015	5	Female	Buttocks & Perineum	Ulcer	I	CR8	16	Swab	UnKnown		Positive		Not applicable
180	no	Agogo	2015	31	Male	Lower limb	Ulcer	I	CR8	19	Swab	8	59	Positive		Not applicable
181	no	Agogo	2015	40	Male	Lower limb	Ulcer	I	CR8	6	Swab	8	58	Positive		Not applicable
182	no	Tepa	2015	13	Female	Lower limb	Ulcer	I	SR8	4	Swab	UnKnown		Positive		Not applicable
183	no	Tepa	2015	14	Male	Upper limb	Ulcer	I	SR8	24	Swab	UnKnown		Positive		Not applicable
184	no	Nkawie	2015	57	Female	Lower limb	Ulcer	I	SR8	28	Swab	UnKnown		Positive		Not applicable
185	yes	Agogo	2015	9	Male	Lower limb	Plaque	II	SR8	44	FNA	8	25	Positive	12	Enlarged, Warm to touch	enlarged
186	no	Agogo	2015	5.2	Male	Upper limb	Nodule	I	SR8	13	FNA	2	20	Positive		Not applicable
188	no	Agogo	2015	13	Female	Upper limb	Nodule	I	SR8	4	FNA	8	40	Positive		Not applicable
189	no	Agogo	2015	25	Male	Buttocks & Perineum	Ulcer	I	CR8	8	Swab	2	76	Positive		Not applicable
191	no	Tepa	2015	5	Male	Lower limb	Ulcer	I	SR8	5	Swab	UnKnown		Positive		Not applicable
192	yes	Tepa	2015	18	Male	Upper limb	Ulcer	II	CR8	32	Swab	3	53	Positive	10	New Lesion	new lesion
193	no	Tepa	2015	17	Male	Back	Ulcer	II	CR8	24	Swab	12	59	Positive		Not applicable
194	no	Nkawie	2015	45	Female	Lower limb	Ulcer	I	SR8	52	Swab	104	60	Positive		Not applicable
195	no	Tepa	2015	75	Female	Lower limb	Ulcer	II	CR8	52	Swab	8	59	Positive		Not applicable
196	no	Tepa	2015	95	Male	Lower limb	Ulcer	II	CR8	28	Swab	16	59	Positive		Not applicable
197	no	Tepa	2015	31	Male	Lower limb	Ulcer	I	CR8	12	Swab	UnKnown		Positive		Not applicable
198	no	Tepa	2015	24	Male	Lower limb	Ulcer	I	CR8	4	Swab	UnKnown		Positive		Not applicable
199	no	Tepa	2015	32	Male	Lower limb	Ulcer	I	SR8	10	Swab	UnKnown		Positive		Not applicable
200	no	Tepa	2015	11	Male	Lower limb	Ulcer	I	CR8	10	Swab	UnKnown		Positive		Not applicable
201	no	Dunkwa	2015	20	Female	Lower limb	Ulcer	II	CR8	12	Swab	12	50	Positive		Not applicable
202	no	Agogo	2015	41	Male	Lower limb	Ulcer	II	CR8	32	Swab	8	56	Positive		Not applicable
203	yes	Agogo	2015	7	Male	Upper limb	Plaque	II	SR8	44	FNA	2	22	Positive	4	Enlarged, warm, swelling	enlarged
204	no	Agogo	2015	40	Female	Lower limb	Nodule	I	CR8	8	FNA	4	75	Positive		Not applicable
205	no	Tepa	2015	10	Male	Upper limb	Oedema	II	CR8	32	Swab	2	25	Positive		Not applicable
206	no	Tepa	2015	60	Female	Lower limb	Ulcer	II	SR8	16	Swab	8	60	Positive		Not applicable
207	no	Agogo	2015	45	Male	Upper limb	Plaque	I	SR8	24	FNA	6	58	Positive		Not applicable
208	no	Dunkwa	2015	36	Female	Upper limb	Nodule	I	SR8	8	FNA	UnKnown		Positive		Not applicable
209	no	Dunkwa	2015	7	Female	Lower limb	Ulcer	II	CR8	36	Swab	UnKnown		Positive		Not applicable
210	no	Agogo	2015	35	Female	Lower limb	Nodule	I	CR8	4	FNA	2	49	Positive		Not applicable
211	no	Agogo	2015	28	Male	Lower limb	Nodule	I	SR8	41	FNA	UnKnown	73	Positive		Not applicable
212	yes	Agogo	2016	7	Female	Upper limb	Plaque	II	CR8	28	FNA	4	22	Positive	4	Enlargement, Redening and swelling	enlarged
213	no	Agogo	2016	13	Female	Lower limb	Ulcer	II	CR8	24	Swab	2	30	Positive		Not applicable
214	no	Dunkwa	2016	18	Male	Lower limb	Ulcer	II	SR8	12	Swab	UnKnown		Positive		Not applicable
215	no	Tepa	2016	14	Male	Lower limb	Ulcer	II	CR8	12	Swab	UnKnown		Positive		Not applicable
216	no	Tepa	2016	47	Female	Lower limb	Nodule	I	CR8	6	FNA	UnKnown		Positive		Not applicable
217	no	Tepa	2016	19	Male	Upper limb	Ulcer	II	CR8	40	Swab	24	43	Positive		Not applicable
218	no	Agogo	2016	7	Male	Upper limb	Nodule	I	SR8	16	FNA	3	22	Positive		Not applicable
219	no	Agogo	2016	35	Female	Lower limb	Nodule	I	CR8	36	FNA	3	58	Positive		Not applicable
220	yes	Tepa	2016	13	Female	Upper limb	Nodule	I	SR8	24	FNA	1	33	Positive	8	Enlarged, swollen	enlarged
221	no	Tepa	2016	7	Female	Upper limb	Oedema	II	SR8	44	Swab	8	23	Positive		Not applicable
222	no	Nkawie	2016	20	Female	Lower limb	Oedema	II	CR8	10	Swab	6	66	Positive		Not applicable
223	no	Agogo	2016	5	Male	Upper limb	Ulcer	II	CR8	32	Swab	8	21	Positive		Not applicable
224	no	Dunkwa	2016	22	Female	Upper limb	Plaque	II	SR8	12	FNA	4	45	Positive		Not applicable
225	no	Tepa	2016	9	Female	Upper limb	Plaque	II	SR8	40	FNA	2	25	Positive		Not applicable
226	no	Agogo	2016	8	Male	Lower limb	Nodule	I	SR8	12	FNA	6	25	Positive		Not applicable
227	yes	Dunkwa	2016	8	Male	Lower limb	Ulcer	II	CR8	36	Swab	4	23	Positive	6	Enlarged, redening	enlarged
228	yes	Dunkwa	2016	24	Female	Lower limb	Plaque	II	CR8	52	FNA	8	55	Positive	28	New lesion	new lesion
229	no	Dunkwa	2016	27	Female	Lower limb	Ulcer	II	SR8	8	Swab	4	59	Positive		Not applicable
230	no	Nkawie	2016	16	Female	Lower limb	Ulcer	II	CR8	28	Swab	3	40	Positive		Not applicable
231	no	Agogo	2016	30	Male	Upper limb	Plaque	II	CR8	42	FNA	4	59	Positive		Not applicable
232	no	Agogo	2016	19	Male	Upper limb	Nodule	I	SR8	12	FNA	3	65	Positive		Not applicable
233	no	Tepa	2016	46	Male	Back	Ulcer	I	SR8	16	Swab	1	45	Positive		Not applicable
234	no	Agogo	2016	7	Female	Lower limb	Ulcer	I	CR8	11	Swab	4	24	Positive		Not applicable
235	no	Agogo	2016	22	Male	Lower limb	Ulcer	I	SR8	16	FNA	4	54	Positive		Not applicable
236	no	Tepa	2016	40	Female	Upper limb	Ulcer	I	SR8	24	Swab	12	48	Positive		Not applicable
237	no	Tepa	2016	15	Female	Head & Neck	Ulcer	II	SR8	8	Swab	4	32	Positive		Not applicable
238	no	Tepa	2016	35	Male	Lower limb	Ulcer	I	CR8	12	Swab	8	54	Positive		Not applicable
239	no	Tepa	2016	84	Female	Lower limb	Ulcer	II	SR8	20	Swab	8	55	Positive		Not applicable
240	no	Tepa	2016	66	Male	Lower limb	Ulcer	II	CR8	12	Swab	12	40	Positive		Not applicable
241	no	Tepa	2016	15	Male	Lower limb	Ulcer	I	CR8	6	Swab	12	55	Positive		Not applicable
242	no	Agogo	2016	22	Female	Lower limb	Ulcer	II	CR8	44	Swab	20	48	Positive		Not applicable
243	yes	Agogo	2016	72	Male	Lower limb	Ulcer	II	CR8	52	Swab	13	55	Positive	10	New Lesion	new lesion
244	no	Agogo	2016	64	Male	Lower limb	Ulcer	I	CR8	2	FNA	4	64	Positive		Not applicable
245	no	Nkawie	2016	18	Female	Upper limb	Ulcer	I	SR8	8	Swab	11	61	Positive		Not applicable
246	no	Tepa	2016	13	Male	Lower limb	Ulcer	I	SR8	4	Swab	UnKnown	41	Positive		Not applicable
247	no	Tepa	2016	19	Female	Lower limb	Ulcer	I	SR8	4	Swab	UnKnown	59	Positive		Not applicable
248	no	Nkawie	2016	16	Female	Lower limb	Ulcer	II	SR8	12	Swab	3	52	Positive		Not applicable
249	no	Tepa	2016	37	Female	Upper limb	Ulcer	II	SR8	28	Swab	8	71	Positive		Not applicable
250	no	Agogo	2016	7	Female	Lower limb	Nodule	I	CR8	2	FNA	2	25	Positive		Not applicable
251	no	Tepa	2016	9	Male	Lower limb	Ulcer	II	CR8	52	Swab	2	42	Positive		Not applicable
252	no	Agogo	2016	35	Female	Lower limb	Ulcer	I	SR8	6	Swab	4	55	Positive		Not applicable
253	no	Agogo	2016	11	Male	Upper limb	Nodule	I	CR8	32	FNA	2	35	Positive		Not applicable
254	yes	Agogo	2013	25	Male	Lower limb	Ulcer	III	CR8	16	Swab	10	59	Positive	4	New Lesion, redening and fluid filled	new lesion
256	no	Agogo	2013	5	Male	Eye	Ulcer	III	CR8	16	Swab	12	17	Positive		Not applicable
257	no	Agogo	2013	7	Male	Lower limb	Ulcer	III	SR8	44	Swab	4	28	Positive		Not applicable
258	no	Agogo	2013	3	Female	Lower limb	Ulcer	I	CR8	8	Swab	4	13	Positive		Not applicable
259	no	Agogo	2013	1.5	Male	Upper limb	Ulcer	III	CR8	10	Swab	2	11	Positive		Not applicable
260	no	Agogo	2013	30	Female	Upper limb	Nodule	I	SR8	23	FNA	12	68	Positive		Not applicable
261	no	Agogo	2014	4	Female	Upper limb	Nodule	I	CR8	6	FNA	3	15	Positive		Not applicable
262	no	Agogo	2014	4	Male	Lower limb	Nodule	I	CR8	4	FNA	2	16	Positive		Not applicable
263	no	Agogo	2014	23	Female	Upper limb	Ulcer	III	CR8	36	Swab	16	46	Positive		Not applicable
264	yes	Agogo	2014	6	Male	Back	Plaque	II	CR8	28	FNA	12	20	Positive	6	Enlarged, Warm to touch	enlarged
265	no	Agogo	2014	37	Male	Upper limb	Nodule	I	CR8	7	FNA	52	56	Positive		Not applicable
266	no	Agogo	2014	6	Male	Lower limb	Oedema	III	CR8	57	FNA	1	19	Positive		Not applicable
267	no	Agogo	2014	30	Female	Upper limb	Plaque	II	SR8	20	Swab	2	50	Positive		Not applicable
268	no	Agogo	2014	3	Male	Lower limb	Nodule	I	SR8	7	FNA	4	11	Positive		Not applicable
269	no	Agogo	2014	2	Male	Lower limb	Nodule	I	CR8	12	FNA	2	13	Positive		Not applicable
271	yes	Agogo	2014	10	Male	Lower limb	Ulcer	III	CR8	20	Swab	8	28	Positive	26	Enlarged, Warm to touch	enlarged
272	no	Agogo	2014	42	Female	Lower limb	Ulcer	III	CR8	10	Swab	UnKnown	70	Positive		Not applicable
273	no	Agogo	2014	3.5	Female	Lower limb	Nodule	I	CR8	6	FNA	12	15	Positive		Not applicable
274	yes	Agogo	2014	12	Male	Lower limb	Nodule	I	SR8	4	FNA	4	37	Positive	42	New Lesion	new lesion
275	no	Agogo	2014	19	Male	Upper limb	Nodule	I	SR8	6	FNA	4	66	Positive		Not applicable
276	no	Agogo	2014	1.5	Female	Lower limb	Ulcer	I	SR8	4	Swab	3	8.2	Positive		Not applicable
277	no	Agogo	2014	3	Female	Lower limb	Nodule	I	SR8	4	FNA	4	15	Positive		Not applicable
278	no	Agogo	2014	2	Male	Lower limb	Plaque	II	SR8	11	FNA	2	14	Positive		Not applicable
280	no	Agogo	2014	1.5	Male	Lower limb	Ulcer	I	SR8	4	Swab	UnKnown		Positive		Not applicable
282	no	Agogo	2014	15	Male	Upper limb	Nodule	I	SR8	24	FNA	3	43	Positive		Not applicable
283	no	Agogo	2014	3	Male	Upper limb	Nodule	I	CR8	5	FNA	3	11	Positive		Not applicable
284	no	Agogo	2014	52	Female	Lower limb	Ulcer	III	CR8	13	Swab	4	46	Positive		Not applicable
286	no	Agogo	2014	4	Female	Lower limb	Ulcer	I	SR8	9	Swab	4	12	Positive		Not applicable
287	no	Agogo	2014	40	Female	Lower limb	Nodule	I	SR8	4	FNA	4	49	Positive		Not applicable
288	no	Agogo	2015	41	Female	Lower limb	Plaque	II	CR8	8	FNA	8	60	Positive		Not applicable
289	no	Agogo	2015	13	Female	Lower limb	Nodule	I	SR8	36	FNA	4	44	Positive		Not applicable
290	no	Agogo	2015	14	Male	Lower limb	Oedema	III	CR8	40	Swab	7	39	Positive		Not applicable
291	no	Agogo	2015	56	Male	Genitalia	Ulcer	II	SR8	2	Swab	1	56	Positive		Not applicable
292	no	Agogo	2015	27	Female	Lower limb	Ulcer	III	CR8	76	Swab	4	54	Positive		Not applicable
293	no	Agogo	2015	4	Female	Lower limb	Plaque	II	SR8	13	FNA	4	12	Positive		Not applicable
294	no	Agogo	2015	20	Female	Upper limb	Nodule	I	SR8	7	FNA	2	63	Positive		Not applicable
295	no	Agogo	2015	11	Male	Lower limb	Ulcer	III	CR8	30	Swab	4	23	Positive		Not applicable
296	no	Agogo	2015	5	Male	Upper limb	Ulcer	I	SR8	5	Swab	2	18	Positive		Not applicable
297	no	Agogo	2015	5	Female	Upper limb	Ulcer	I	SR8	7	Swab	4	15	Positive		Not applicable
298	no	Agogo	2015	5	Male	Lower limb	Ulcer	III	SR8	24	Swab	4	16	Positive		Not applicable
299	no	Agogo	2015	33	Female	Upper limb	Nodule	I	SR8	6	FNA	4	67	Positive		Not applicable
300	no	Agogo	2015	49	Female	Lower limb	Ulcer	III	SR8	15	Swab	4	65	Positive		Not applicable
301	no	Agogo	2016	3	Female	Lower limb	Nodule	I	SR8	4	FNA	1	13	Positive		Not applicable
302	no	Agogo	2016	2	Female	Upper limb	Ulcer	I	SR8	6	FNA	2	12	Positive		Not applicable
303	no	Agogo	2016	17	Female	Lower limb	Plaque	II	CR8	20	FNA	3	49	Positive		Not applicable
304	no	Agogo	2016	2	Female	Lower limb	Nodule	I	SR8	12	FNA	3	14	Positive		Not applicable
305	no	Agogo	2016	65	Female	Lower limb	Ulcer	III	CR8	17	Swab	3	75	Positive		Not applicable
306	no	Agogo	2016	14	Female	Upper limb	Ulcer	III	SR8	24	Swab	UnKnown	49	Positive		Not applicable
307	no	Agogo	2016	20	Female	Upper limb	Plaque	III	CR8	43	FNA	4	70	Positive		Not applicable
308	no	Agogo	2016	53	Male	Lower limb	Ulcer	III	CR8	47	Swab	10	85	Positive		Not applicable
309	yes	Agogo	2016	5	Male	Thorax	Ulcer	III	SR8	30	Swab	4	21	Positive	4	Enlarged, Warm to touch	enlarged
310	no	Agogo	2016	48	Male	Upper limb	Oedema	III	CR8	55	Swab	24	51	Positive		Not applicable
311	no	Agogo	2016	54	Male	Lower limb	Ulcer	I	SR8	11	Swab	2	77	Positive		Not applicable
312	no	Agogo	2016	43	Male	Lower limb	Ulcer	III	CR8	19	Swab	4	77	Positive		Not applicable
313	no	Agogo	2016	32	Female	Upper limb	Nodule	I	SR8	10	FNA	4	57	Positive		Not applicable
314	no	Dunkwa	2014	44	Male	Lower limb	Ulcer	III	SR8	24	Swab	UnKnown		Positive		Not applicable
315	no	Dunkwa	2014	44	Male	Lower limb	Ulcer	III	SR8	32	Swab	UnKnown		Positive		Not applicable
316	no	Dunkwa	2015	28	Female	Upper limb	Ulcer	II	CR8	20	Swab	UnKnown		Positive		Not applicable
317	no	Dunkwa	2015	4	Female	Lower limb	Ulcer	I	CR8	4	Swab	UnKnown		Positive		Not applicable
318	no	Dunkwa	2015	14	Female	Upper limb	Ulcer	III	CR8	36	Swab	UnKnown		Positive		Not applicable
319	no	Dunkwa	2016	55	Female	Lower limb	Ulcer	I	CR8	12	Swab	28	58	Positive		Not applicable
320	no	Dunkwa	2016	8	Female	Upper limb	Ulcer	III	CR8	28	Swab	UnKnown		Positive		Not applicable
326	no	Nkawie	2014	16	Female	Lower limb	Ulcer	III	SR8	8	Swab	2	54	Positive		Not applicable
330	yes	Nkawie	2013	19	Male	Upper limb	Oedema	III	SR8	44	FNA	8	62	Positive	8	Enlarged, Warm to touch	enlarged
337	no	Nkawie	2015	46	Male	Lower limb	Oedema	II	CR8	52	FNA	3	75	Positive		Not applicable
339	yes	Nkawie	2015	12	Male	Lower limb	Oedema	III	SR8	60	FNA	4	32	Positive	8	New Lesion	new lesion
340	no	Nkawie	2016	70	Female	Lower limb	Ulcer	III	SR8	28	Swab	12	66	Positive		Not applicable
341	no	Nkawie	2016	26	Female	Upper limb	Oedema	III	CR8	40	Swab	6	54	Positive		Not applicable
342	no	Tepa	2013	13	Male	Upper limb	Ulcer	III	SR8	20	Swab	4	35	Positive		Not applicable
343	no	Tepa	2013	5	Male	Upper limb	Ulcer	III	SR8	8	Swab	28	24	Positive		Not applicable
345	no	Tepa	2013	35	Female	Lower limb	Ulcer	II	CR8	8	Swab	6	61	Positive		Not applicable
346	no	Tepa	2013	51	Female	Upper limb	Oedema	II	SR8	8	Swab	3	65	Positive		Not applicable
347	no	Tepa	2013	7	Male	Lower limb	Ulcer	III	SR8	16	Swab	UnKnown		Positive		Not applicable
348	yes	Tepa	2013	13	Male	Upper limb	Oedema	III	SR8	12	FNA	8	28	Positive	6	Enlarged, inflamatory, redened	enlarged
350	no	Tepa	2014	7	Female	Lower limb	Ulcer	II	SR8	12	Swab	8	16	Positive		Not applicable
351	no	Tepa	2014	70	Female	Lower limb	Ulcer	III	SR8	28	Swab	20	51	Positive		Not applicable
352	no	Tepa	2014	13	Female	Lower limb	Ulcer	III	SR8	24	Swab	UnKnown		Positive		Not applicable
353	no	Tepa	2014	63	Female	Back	Ulcer	III	SR8	20	Swab	UnKnown		Positive		Not applicable
354	no	Tepa	2014	9	Male	Eye	Ulcer	III	SR8	62	Swab	5	54	Positive		Not applicable
355	no	Tepa	2014	40	Male	Lower limb	Ulcer	III	SR8	28	Swab	52	59	Positive		Not applicable
356	no	Tepa	2014	42	Male	Lower limb	Nodule	III	SR8	64	FNA	52	60	Positive		Not applicable
357	no	Tepa	2014	2	Male	Upper limb	Ulcer	I	SR8	44	Swab	UnKnown		Positive		Not applicable
359	no	Tepa	2014	52	Male	Lower limb	Ulcer	III	SR8	48	Swab	2	56	Positive		Not applicable
360	no	Tepa	2014	42	Male	Lower limb	Ulcer	III	SR8	36	Swab	30	56	Positive		Not applicable
361	no	Tepa	2015	12	Male	Upper limb	Oedema	III	SR8	22	Swab	2	35	Positive		Not applicable
362	no	Tepa	2015	19	Female	Lower limb	Ulcer	I	SR8	16	Swab	4	42	Positive		Not applicable
363	no	Tepa	2015	17	Male	Lower limb	Oedema	III	SR8	52	Swab	24	40	Positive		Not applicable
364	no	Tepa	2015	35	Female	Lower limb	Oedema	III	SR8	36	FNA	2	52	Positive		Not applicable
365	no	Tepa	2015	6	Male	Lower limb	Ulcer	III	SR8	52	Swab	20	18	Positive		Not applicable
366	no	Tepa	2016	5	Male	Lower limb	Oedema	II	SR8	8	FNA	UnKnown		Positive		Not applicable
367	no	Tepa	2016	34	Male	Lower limb	Ulcer	III	SR8	52	Swab	UnKnown		Positive		Not applicable
368	no	Tepa	2016	2	Female	Upper limb	Ulcer	I	SR8	8	Swab	24	10	Positive		Not applicable
369	no	Agogo	2017	23	Female	Upper limb	Plaque	III	SR8	40	FNA	3	22	Positive		Not applicable
370	no	Agogo	2016	2	Female	Lower limb	Nodule	I	SR8	10	FNA	2	66	Positive		Not applicable
372	no	Tepa	2015	43	Male	Upper limb	Ulcer	II	SR8	16	Swab	16	63	Positive		Not applicable
373	no	Tepa	2015	50	Female	Back	Ulcer	II	SR8	20	Swab	3	45	Positive		Not applicable
374	no	Tepa	2015	42	Male	Lower limb	Ulcer	III	CR8	52	FNA	4	55	Positive		Not applicable
375	no	Nkawie	2017	10	Male	Upper limb	Oedema	III	SR8	36	Swab	8	26	Positive		Not applicable
376	yes	Nkawie	2015	45	Male	Lower limb	Ulcer	II	SR8	20	Swab	4	66	Positive	16	Enlarged, warm to touch and pus filled	enlarged
377	no	Tepa	2016	48	Male	Lower limb	Ulcer	I	SR8	12	Swab	28	42	Positive		Not applicable
378	no	Agogo	2015	27	Female	Lower limb	Ulcer	I	SR8	12	FNA	8	44	Positive		Not applicable
379	no	Agogo	2017	8	Female	Upper limb	Nodule	I	CR8	6	FNA	8	27	Positive		Not applicable
380	no	Tepa	2015	18	Female	Upper limb	Ulcer	II	SR8	4	Swab	52	52	Positive		Not applicable
381	no	Agogo	2017	3	Female	Lower limb	Nodule	I	CR8	4	FNA	1	12	Positive		Not applicable
382	no	Nkawie	2017	50	Male	Upper limb	Ulcer	I	CR8	38	Swab	8	68	Positive		Not applicable
383	no	Dunkwa	2017	24	Female	Upper limb	Ulcer	III	CR8	32	Swab	4	46	Positive		Not applicable
385	no	Agogo	2017	13	Female	Lower limb	Ulcer	I	CR8	2	Swab	2	44	Positive		Not applicable
386	no	Agogo	2017	8	Female	Genitalia	Ulcer	III	CR8	16	Swab	4	29	Positive		Not applicable
388	no	Dunkwa	2014	60	Male	Lower limb	Ulcer	II	CR8	16	Swab	UnKnown		Positive		Not applicable
390	no	Agogo	2017	9	Female	Upper limb	Ulcer	III	CR8	48	Swab	24	36	Positive		Not applicable
392	no	Agogo	2017	11	Male	Lower limb	Ulcer	III	CR8	16	Swab	4	40	Positive		Not applicable
393	no	Agogo	2017	64	Male	Lower limb	Ulcer	III	CR8	16	Swab	52	71	Positive		Not applicable
394	no	Tepa	2017	42	Female	Lower limb	Ulcer	III	CR8	20	Swab	36	54	Positive		Not applicable
395	no	Agogo	2017	11	Male	Upper limb	Ulcer	III	CR8	12	Swab	48	38	Positive		Not applicable
397	yes	Tepa	2014	13	Female	Lower limb	Oedema	II	SR8	24	Swab	2	28	Positive	16	New Lesion	new lesion
