# Supplementary material
Source: publisher figshare collection journal article supplement (https://plos.figshare.com/articles/dataset/_/9731729)
Supplement: Supplementary file 1 [file 1 › pntd.0007689.s003.pdf]

**Burulipath study**  
**Laboratory Entry Form**

**Country: Ghana**  
**Date** .....20....

Use separate form for each "visit" and each lesion (if multiple lesions) per patient!  
Also fill WHO BU01 and BU04 for laboratory

**A: Patient ID Number** ..... **Hospital** .....

**Family name** ..... **First name** .....

**Village**..... **District**.....

**Age** ..... **Sex** ☐ m ☐ f **BCG Scar** ☐ yes ☐ no

**B: Classification** **New case** ☐ **Relapse** ☐ **Follow up** ☐

**C: Clinical Presentation**

Nodule ☐ Papule ☐ Plaque ☐ Single lesion ☐  
Ulcer ☐ Edema ☐ Osteomyelitis ☐ Multiple lesions ☐

**D: Visit (Time of sample collection)**

a) pre-treatment ☐ b) week 4 ☐ c) week 8 ☐ d) week 12 ☐ e) week 16 ☐

**E: Duration of Disease**

..... days ..... weeks ..... months

**F: Location of the Lesion**

**Remarks:**

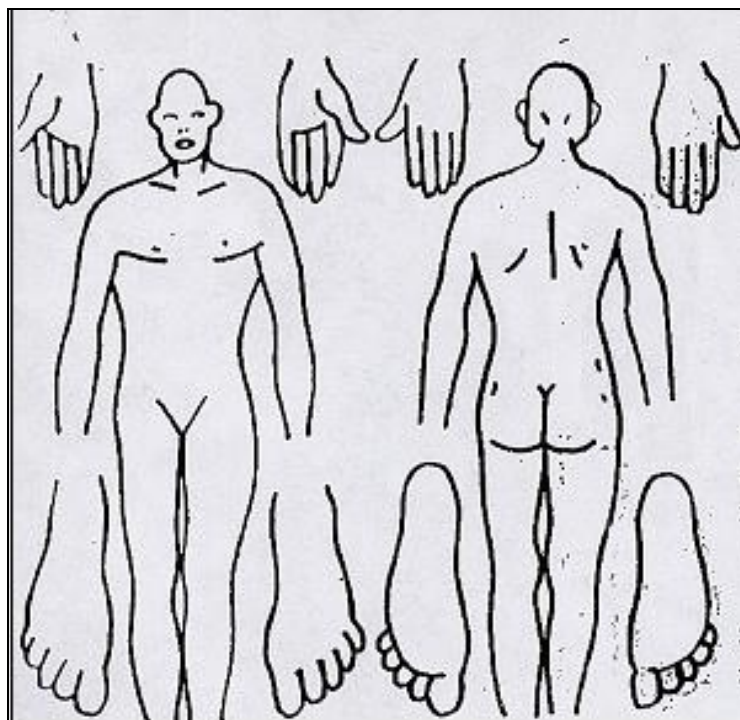

(Photographical) documentation: yes ☐ no ☐

Burulipath study

lesion tracing/measured

G: lesion tracing

Indicate with 'H' when healed

Country: Ghana

☐

yes

| Week<br>of<br>visit | AREA<br>(CM <sup>2</sup> ) | VOLUME(CM <sup>3</sup> ) | PERIMETER<br>(CM) | MEAN.<br>DEPTH<br>(MM) | MIN.<br>DEPTH<br>(MM) | MAXI.<br>DEPTH<br>(MM) | LONG.<br>DIAMETER<br>(CM) | SHORT.<br>DIAMETER<br>(CM) |
|---------------------|----------------------------|--------------------------|-------------------|------------------------|-----------------------|------------------------|---------------------------|----------------------------|
| 0                   |                            |                          |                   |                        |                       |                        |                           |                            |
|                     |                            |                          |                   |                        |                       |                        |                           |                            |
| 2                   |                            |                          |                   |                        |                       |                        |                           |                            |
|                     |                            |                          |                   |                        |                       |                        |                           |                            |
| 4                   |                            |                          |                   |                        |                       |                        |                           |                            |
|                     |                            |                          |                   |                        |                       |                        |                           |                            |
| 6                   |                            |                          |                   |                        |                       |                        |                           |                            |
|                     |                            |                          |                   |                        |                       |                        |                           |                            |
| 8                   |                            |                          |                   |                        |                       |                        |                           |                            |
|                     |                            |                          |                   |                        |                       |                        |                           |                            |
| 12                  |                            |                          |                   |                        |                       |                        |                           |                            |
|                     |                            |                          |                   |                        |                       |                        |                           |                            |
| 16                  |                            |                          |                   |                        |                       |                        |                           |                            |
|                     |                            |                          |                   |                        |                       |                        |                           |                            |
| 20                  |                            |                          |                   |                        |                       |                        |                           |                            |
|                     |                            |                          |                   |                        |                       |                        |                           |                            |
| 24                  |                            |                          |                   |                        |                       |                        |                           |                            |
|                     |                            |                          |                   |                        |                       |                        |                           |                            |
| 28                  |                            |                          |                   |                        |                       |                        |                           |                            |
|                     |                            |                          |                   |                        |                       |                        |                           |                            |
| 32                  |                            |                          |                   |                        |                       |                        |                           |                            |
|                     |                            |                          |                   |                        |                       |                        |                           |                            |
| 40                  |                            |                          |                   |                        |                       |                        |                           |                            |
|                     |                            |                          |                   |                        |                       |                        |                           |                            |
| 44                  |                            |                          |                   |                        |                       |                        |                           |                            |
|                     |                            |                          |                   |                        |                       |                        |                           |                            |
| 48                  |                            |                          |                   |                        |                       |                        |                           |                            |
|                     |                            |                          |                   |                        |                       |                        |                           |                            |
| 52                  |                            |                          |                   |                        |                       |                        |                           |                            |

# Burulipath study

Country: Ghana

## H: Clinical samples

|                                                |                     |                  |         |
|------------------------------------------------|---------------------|------------------|---------|
|                                                |                     |                  |         |
| Baseline                                       | FNA O               | Swab O           |         |
| PCR sample taken <input type="checkbox"/>      |                     |                  |         |
| 16S rRNA sample taken <input type="checkbox"/> |                     |                  |         |
| Culture sample taken <input type="checkbox"/>  |                     |                  |         |
| AFB samples taken <input type="checkbox"/>     |                     |                  |         |
| Blood taken <input type="checkbox"/>           | Heparinized blood O | EDTA blood O     | Serum O |
|                                                |                     |                  |         |
| Week 4                                         | FNA O               | Swab O           |         |
| 16S Rrna sample taken <input type="checkbox"/> |                     |                  |         |
| Culture sample taken <input type="checkbox"/>  |                     |                  |         |
| AFB sample taken <input type="checkbox"/>      |                     |                  |         |
| Blood taken <input type="checkbox"/>           | Heparinized blood O | 3mm punch/swab O | Serum O |
|                                                |                     |                  |         |
| Week 8                                         | FNA O               | Swab O           |         |
| 16S Rrna sample taken <input type="checkbox"/> |                     |                  |         |
| Culture sample taken <input type="checkbox"/>  |                     |                  |         |
| AFB sample taken <input type="checkbox"/>      |                     |                  |         |
| Blood taken <input type="checkbox"/>           | Heparinized blood O | 3mm punch/swab O | Serum O |
|                                                |                     |                  |         |
| Week 12                                        | FNA O               | Swab O           |         |
| 16S Rrna sample taken <input type="checkbox"/> |                     |                  |         |
| Culture sample taken <input type="checkbox"/>  |                     |                  |         |
| AFB sample taken <input type="checkbox"/>      |                     |                  |         |
| Blood taken <input type="checkbox"/>           | Heparinized blood O |                  | Serum O |
|                                                |                     |                  |         |
| Week 16                                        | FNA O               | Swab O           |         |
| 16S Rrna sample taken <input type="checkbox"/> |                     |                  |         |
| Culture sample taken <input type="checkbox"/>  |                     |                  |         |
| AFB sample taken <input type="checkbox"/>      |                     |                  |         |
| Blood taken <input type="checkbox"/>           | Heparinized blood O |                  | Serum O |
|                                                |                     |                  |         |
| Paradoxical reaction                           |                     |                  |         |
| Blood taken                                    | Heparinized blood O |                  | Serum O |
|                                                | FNA O               | Swab O           |         |
| PCR samples taken <input type="checkbox"/>     |                     |                  |         |
| 16S rRNA sample taken <input type="checkbox"/> |                     |                  |         |
| Culture sample taken <input type="checkbox"/>  |                     |                  |         |
| AFB sample taken <input type="checkbox"/>      |                     |                  |         |

**Burulipath study**

Heparinized blood 6mls,  
EDTA 2mls,  
Serum 5 ml (whole blood)

**Country: Ghana**

**I: Functional limitation assessment done**

|              |            |           |
|--------------|------------|-----------|
| <b>Wk 0</b>  | <b>Yes</b> | <b>No</b> |
| <b>Wk 8</b>  | <b>Yes</b> | <b>No</b> |
| <b>Wk 52</b> | <b>Yes</b> | <b>No</b> |
